# Supplementary material
Source: Research Square preprint supplement (doi:10.21203/rs.3.rs-9717804/v1)
Supplement: Supplementary file 1 [file 84e0457f1928ce6c18090e19.docx]

Table S1. Summary of sequencing, asssembly, coverage, and restriction pattern analyses (*HpaII*) for metagenomic samples

| Host | Sample ID | Raw reads | Reads post Trimming | Retained (%) | Assembly methods | Genomic Components assembled | Sequence Length (bp) | Coverage | Experimental RFLP (RCA, *Hpa*II) | In silico RFLP (RCA-NGS, *Hpa*II) |
| --- | --- | --- | --- | --- | --- | --- | --- | --- | --- | --- |
| Tomato | 822 | 11,146,053 | 11,139,949 | 99.95 | Metaviral+ mapping vs DNA-A SbBMV + metaviral | DNA-A-1 | 2,602 | 35,923.73 | 2000; 1600; 980; 320 | 2,265; 312; 25 |
| DNA-A-2 | 2,601 | 119,565.40 | 2,264; 312: 25 |
| Metaviral + mapping vs DNA-B SbBMV + meta | DNA-B | 2,581 | 62,299.57 | 1,578; 980; 20 |
| Tomato | 823 | 10,056,430 | 10,047,638 | 99.91 | Metaviral | DNA-A | 2,711 | 32,785.86 | 1000; 650; 520; 420; 300; 150 | 668; 538; 471; 303; 279; 178; 169; 105 |
| DNA-B | 2,655 | 48,732.38 | 977; 662; 439; 410; 146; 21 |
| Tomato | 829 | 10,817,727 | 10,809,410 | 99.92 | Host filtering + metaviral | DNA-A | 2,603 | 259,719.19 | 1500; 1300 (x2); 950 | 1,294; 1,284; 25 |
|  |  |  |  |  |  | DNA-B | 2,589 | 123,470.44 |  | 1,525; 949; 115 |
| Pepper | 826 | 17,637,150 | 17,634,136 | 99.98 | Metaviral + mapping SbBMV + meta | DNA-A | 2,603 | 336,751.00 | 1500; 1300 (x2); 950 | 1,294; 1,284; 25 |
| DNA-B | 2,589 | 312,273.00 | 1,524; 949; 115 |
| Pepper | 828 | 17,612,490 | 17,609,883 | 99.99 | Meta + mapping vs viral contigs+ meta | DNA-A | 2,661 | 329,529.00 | 1100; 1000; 900; 800; 500; 420 | 717; 707; 651; 509; 77 |
| DNA-B | 2,653 | 189,315.00 | 1,111; 1,012; 407; 97; 26 |
| Eggplant | 1052 | 14,777,563 | 14,770,596 | 99.95 | Metaviral | DNA-A | 2,603 | 38,158.19 | 1500; 1250 (x2); 950 | 1,294; 1,284; 25 |
| DNA-B | 2,587 | 114,245.16 | 1,524; 948; 115 |
